# Supplementary material for: Cyclin-dependent kinase control of motile ciliogenesis
Source: eLife journal article supplement (doi:10.7554/elife.36375), 2018-08-28
Supplement: supp [file elife-36375-supp-v1.zip]

Archive with 11 entries (11 files):
- elife_poa_e36375_Figure_1_figure_supplement_1.pdf
- elife_poa_e36375_Figure_6_figure_supplement_1.pdf
- elife_poa_e36375_Figure_1_figure_supplement_2.pdf
- elife_poa_e36375_Figure_7_source_data_1.xlsx
- elife_poa_e36375_Figure_5_figure_supplement_1.pdf
- elife_poa_e36375_Transparent_Reporting_File.docx
- elife_poa_e36375_Figure_4_source_data_1.xlsx
- elife_poa_e36375_Figure_7_figure_supplement_1.pdf
- elife_poa_e36375_Figure_3_figure_supplement_1.pdf
- elife_poa_e36375_Figure_4_figure_supplement_1.pdf
- elife_poa_e36375_Supplementary_File_1.docx
