# Supplementary material for: Cyclin-dependent kinase control of motile ciliogenesis
Source: eLife journal article supplement (doi:10.7554/elife.36375), 2018-08-28
Supplement: supp [file elife-36375-supp-v1.zip › elife_poa_e36375_Figure_4_source_data_1.xlsx]

## Sheet: Sheet1
Cdk2-HA signal in ciliating MCCs
	nuclear			cytoplasmic
cell	area	intensity	intensity/ area	area	intensity	intensity/ area		nuclear/ cytoplasmic
1	9259	92.034	0.00993995	12353	71.346	0.0057756		1.72102
2	6552	91.749	0.0140032	10597	73.103	0.00689846		2.0299
3	1506	64.45	0.0427955	3664	53.099	0.0144921		2.95302
4	2700	53.269	0.0197293	6010	35.781	0.00595358		3.31385
5	2849	18.461	0.00647982	3200	15.228	0.00475875		1.36166
6	1474	110.562	0.0750081	1419	77.091	0.0543277		1.38066
7	337	81.083	0.240602	170	35.965	0.211559		1.13728
8	300	52.2	0.174	966	55.352	0.0573002		3.03664
9	667	61.856	0.0927376	388	28.881	0.0744356		1.24588
10	2251	25.699	0.0114167	4889	40.711	0.00832706		1.37104
Cdk2-HA signal in mature MCCs
	nuclear			cytoplasmic
cell	area	intensity	intensity/ area	area	intensity	intensity/ area		nuclear/ cytoplasmic
1	7473	113.339	0.0151665	8918	159.33	0.0178661		0.848896
2	13647	125.976	0.00923104	11821	171.646	0.0145204		0.635728
3	304	52.224	0.171789	428	69.178	0.161631		1.06285
4	534	34.346	0.0643184	322	27.857	0.0865124		0.743458
5	92	99.641	1.08305	93	145.387	1.5633		0.6928
6	125	62.696	0.501568	256	130.051	0.508012		0.987316
7	239	37.017	0.154883	247	51.903	0.210134		0.737068
8	303	25.861	0.0853498	498	49.177	0.098749		0.864311
9	2423	18.804	0.00776063	2048	37.445	0.0182837		0.424456
10	2018	178.015	0.0882136	860	178.595	0.207669		0.424781
