# Supplementary material for: Cyclin-dependent kinase control of motile ciliogenesis
Source: eLife journal article supplement (doi:10.7554/elife.36375), 2018-08-28
Supplement: supp [file elife-36375-supp-v1.zip › elife_poa_e36375_Figure_7_source_data_1.xlsx]

## Sheet: Sheet1
MCCs in Ccna1+/+ mice
mouse	MCC	nonMCC	total cells		fraction MCCs
1	143	269	412		0.347087
2	155	282	437		0.354691
3	148	253	401		0.369077
MCCs in Ccna1-/- mice
mouse	MCC	nonMCC	total cells		fraction MCCs
1	63	335	398		0.158291
2	54	347	401		0.134663
3	66	346	412		0.160194
