# Supplementary figures and images for: Cyclin-dependent kinase control of motile ciliogenesis
Source: eLife journal article supplement (doi:10.7554/elife.36375), 2018-08-28

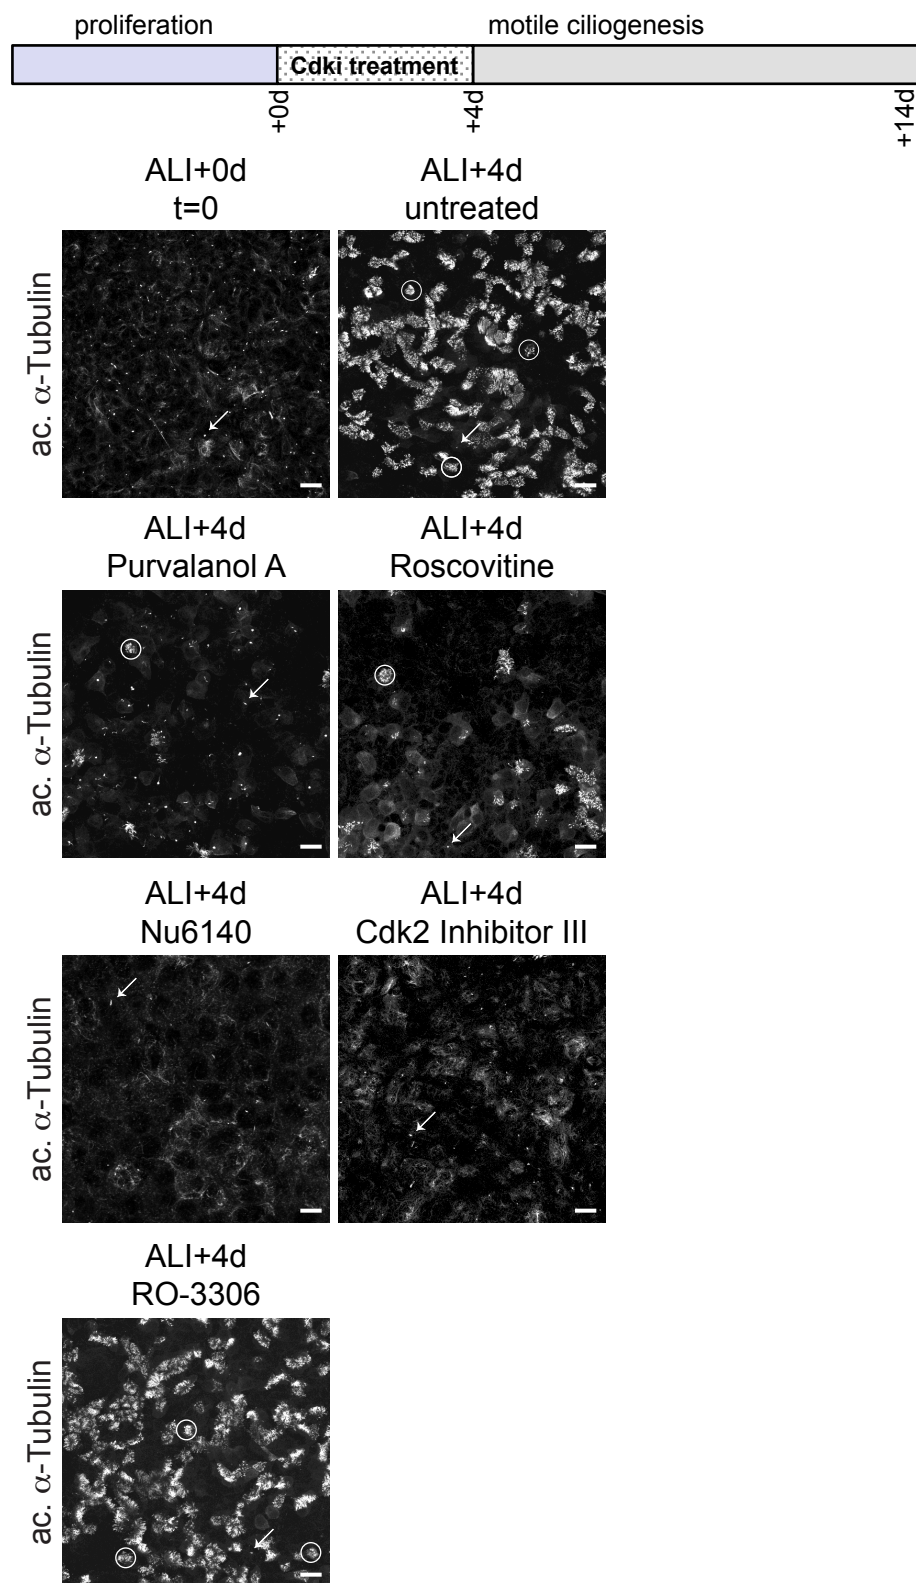

Figure S2

Supplement: supp [file elife-36375-supp-v1.zip]

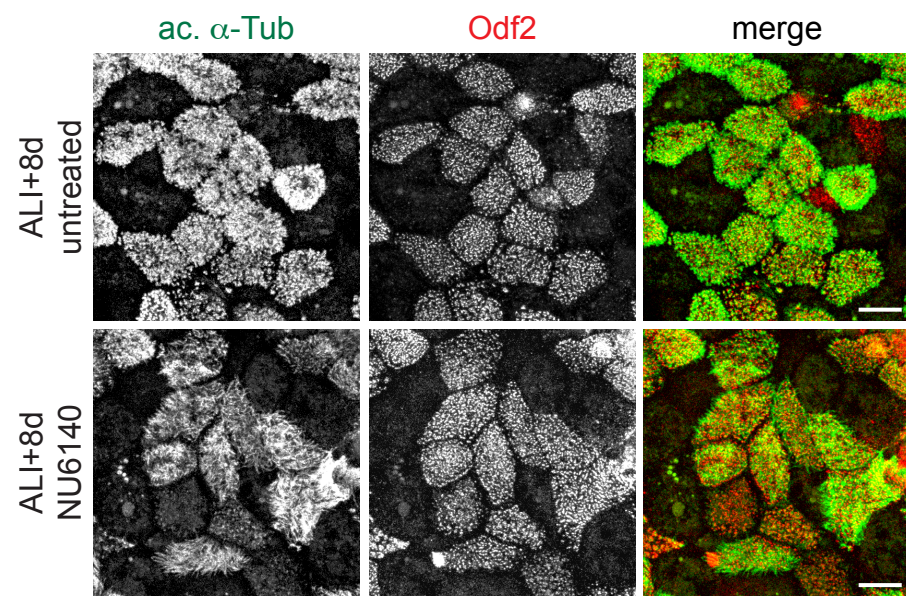

Figure S3

Supplement: supp [file elife-36375-supp-v1.zip]

**A**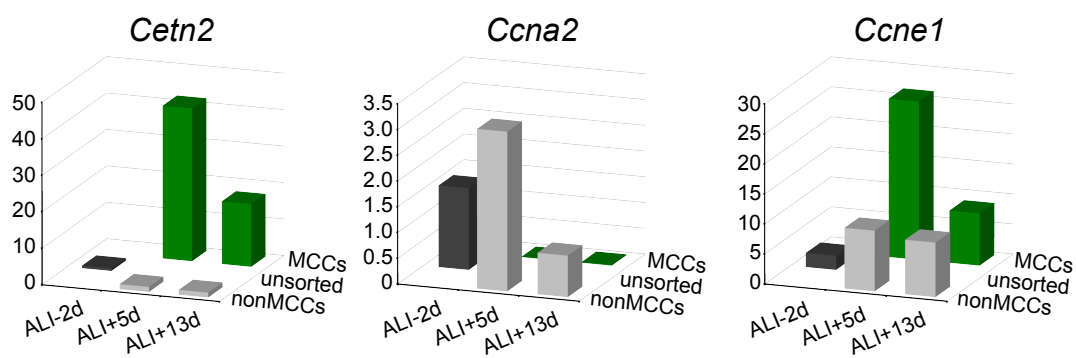**B**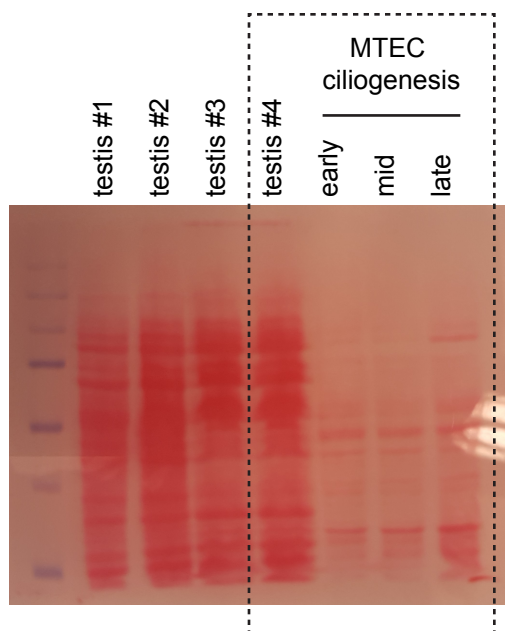**C**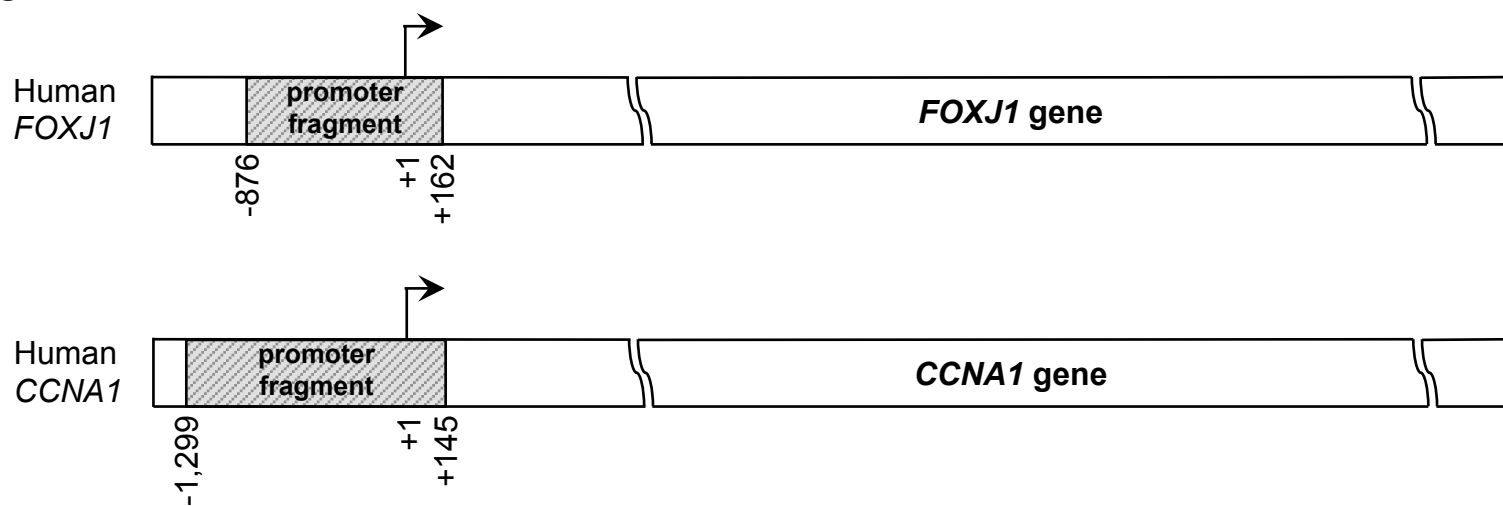

Figure S5

Supplement: supp [file elife-36375-supp-v1.zip]

**A**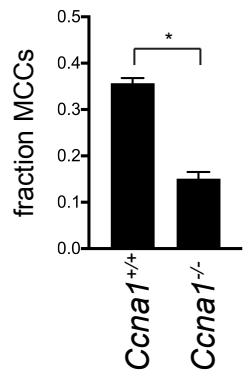**B**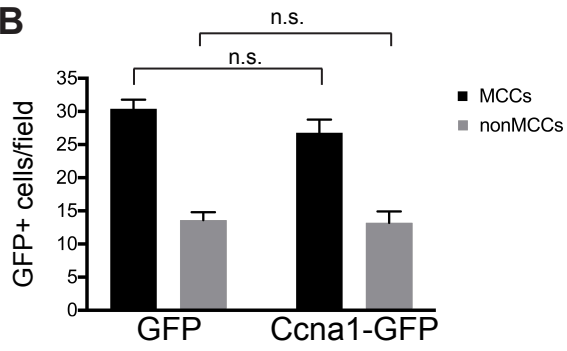

Figure S7

Supplement: supp [file elife-36375-supp-v1.zip]

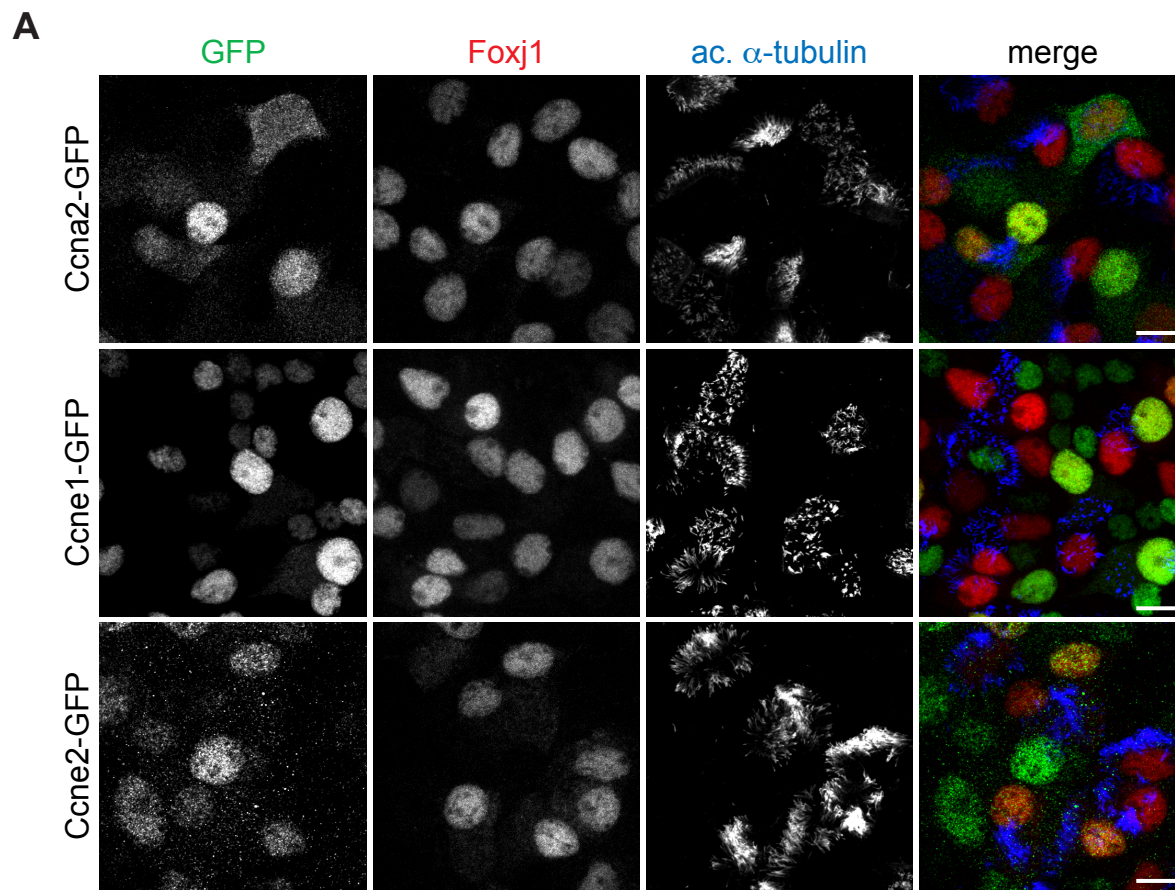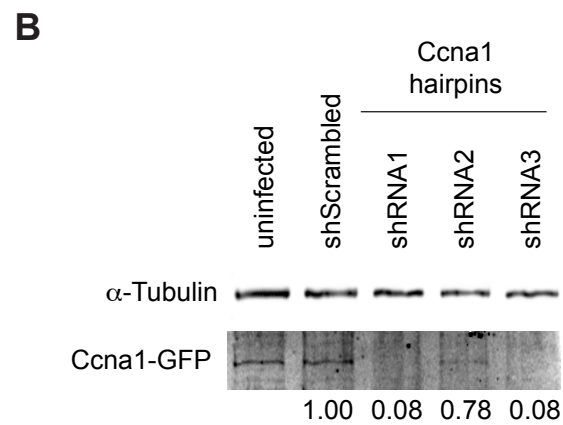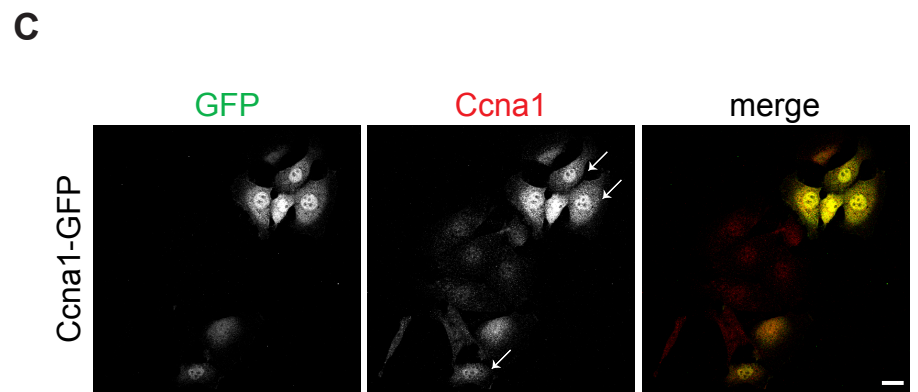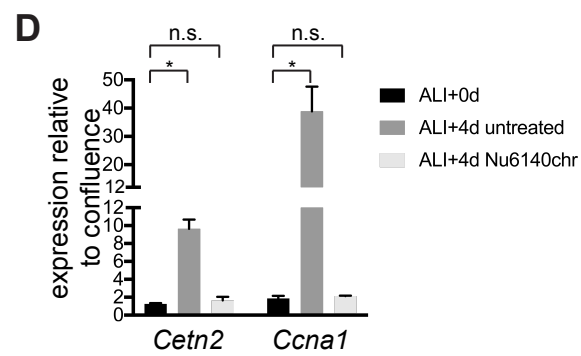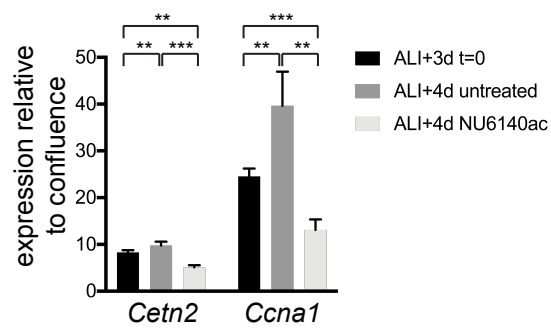

Figure S6

Supplement: supp [file elife-36375-supp-v1.zip]

A

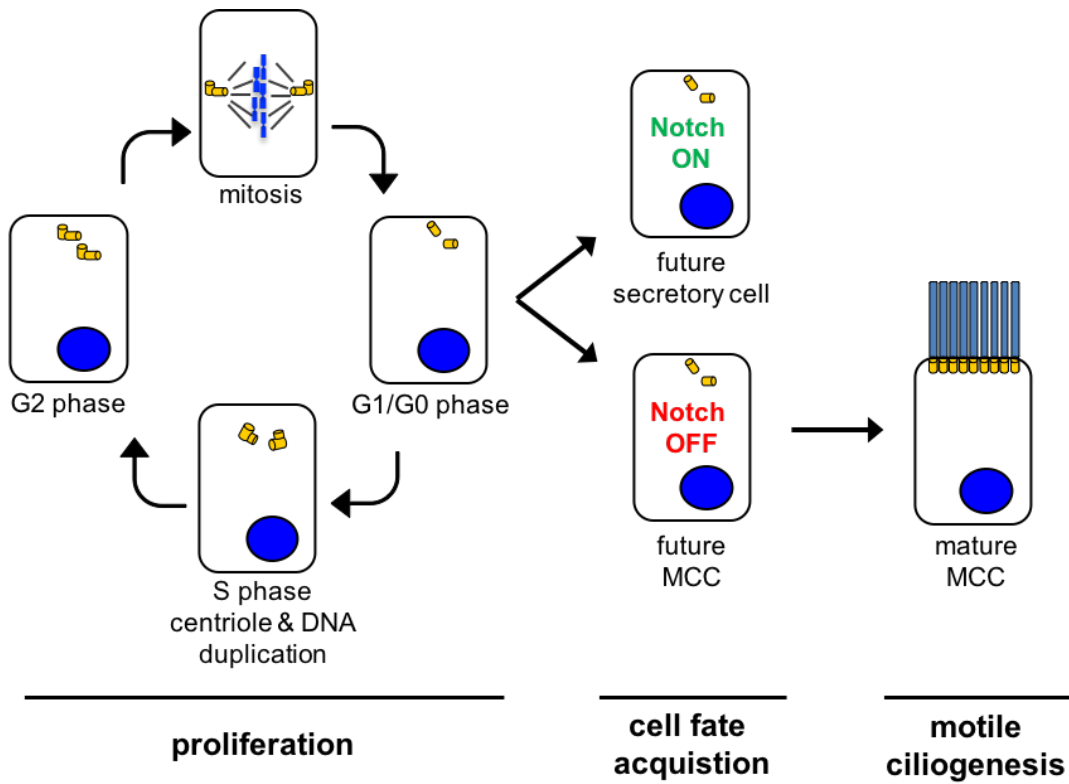

B

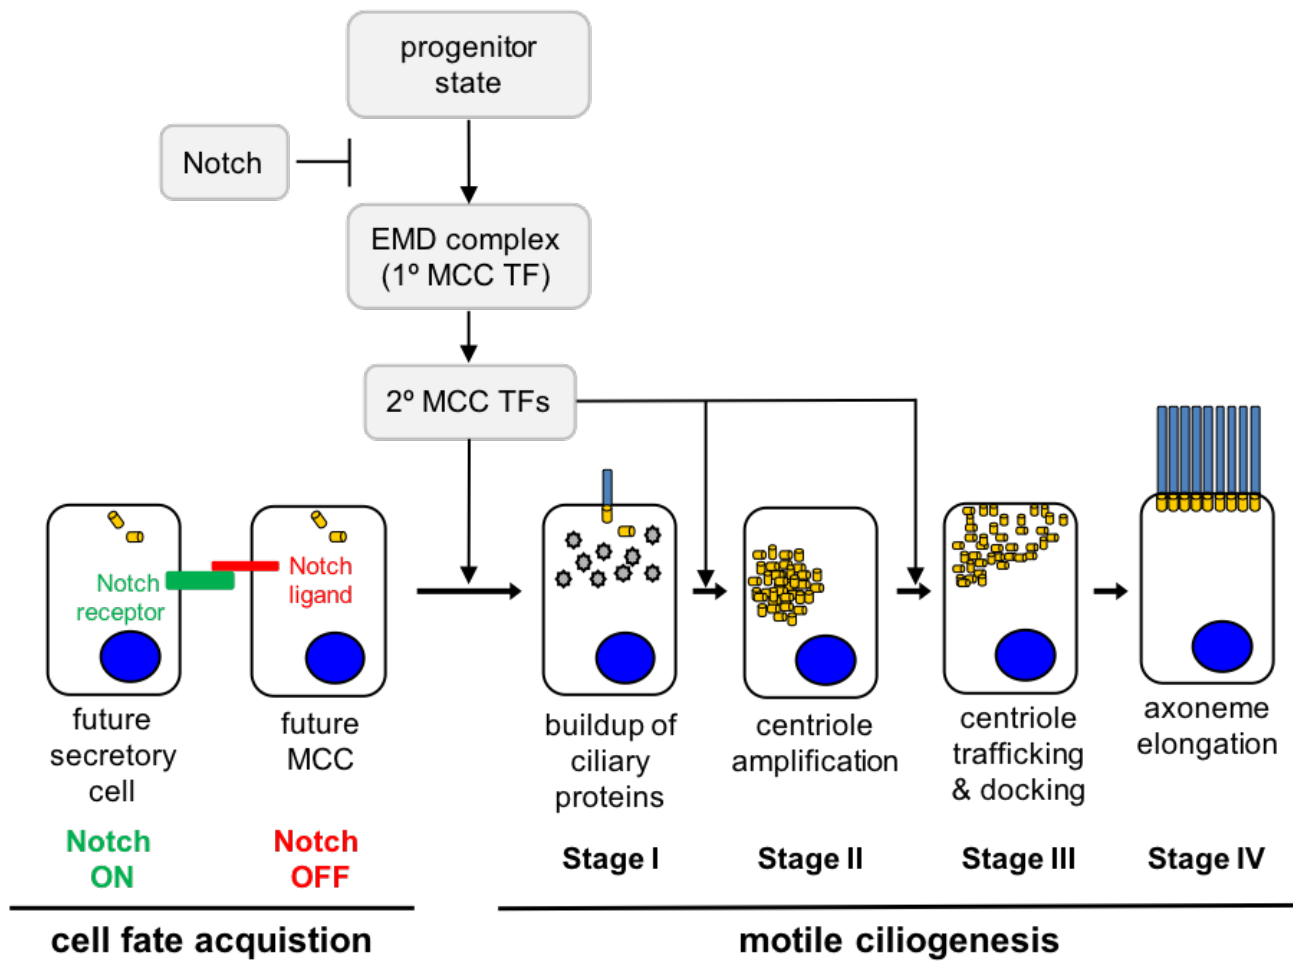

Figure S1

C

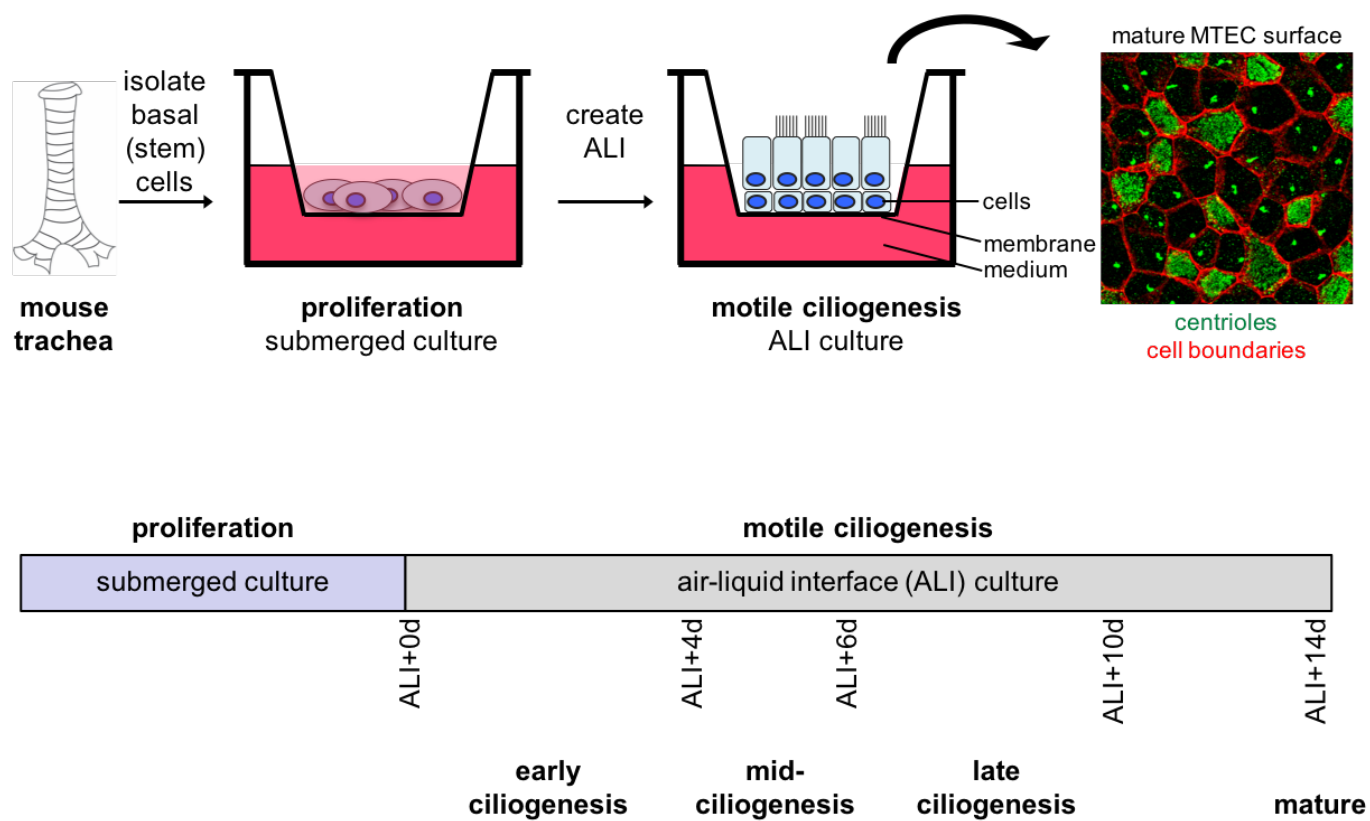

Figure S1

Supplement: supp [file elife-36375-supp-v1.zip]

**A**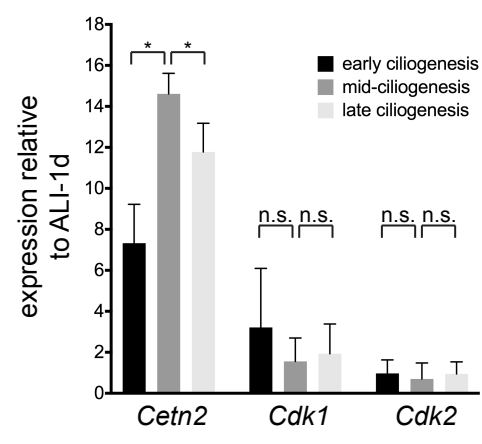**B**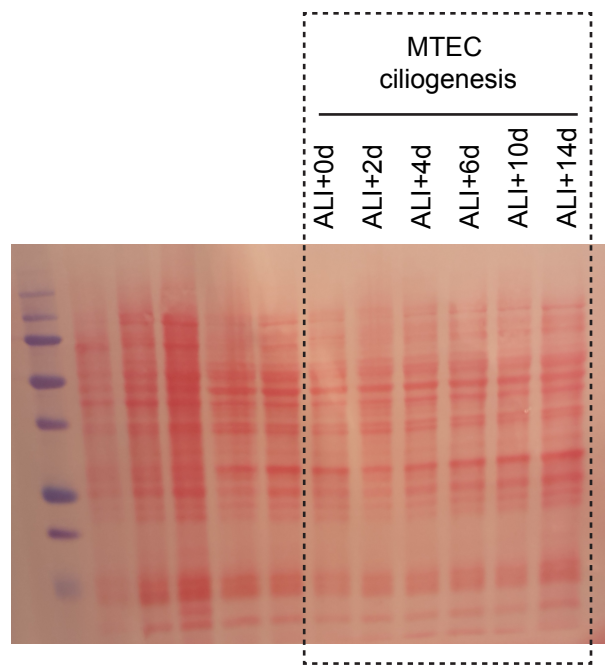

Figure S4

Supplement: supp [file elife-36375-supp-v1.zip › elife_poa_e36375_Figure_4_figure_supplement_1.pdf]
